# Supplementary material
Source: PubMed Central journal article supplement (PMC3038746)
Supplement: 1018515108_pnas.201018515SI.pdf [file 1018515108_pnas.201018515SI.pdf]

# Supporting Information

Cole et al. 10.1073/pnas.1018515108

## SI Materials and Methods

**Stimulation with Cytokines and Toll-Like Receptor Ligands.** Smooth muscle cells (SMC) were cultured in 50-cm<sup>2</sup> tissue culture dishes and grown until near confluence. Atheroma-derived smooth muscle cells (AthSMC) and aortic smooth muscle cells (AoSMC) were serum starved for 24 h and then cultured in Dulbecco's modified Eagle's medium (DMEM) either alone or in the presence of 10 ng/mL IL1 $\alpha$ , 100 ng/mL Pam3Cys, 100 ng/mL FSL-1 (Pam2CGDPKHPKSF), 25  $\mu$ g/mL Poly(I:C), 100 ng/mL lipopolysaccharide, 1  $\mu$ g/mL R837 (Imiquimod) and 1  $\mu$ g/mL PolyU (all purchased from InvivoGen). Supernatants were collected 24 h after stimulation and frozen at  $-80^{\circ}\text{C}$  for batch analysis via ELISA. In the experiments performed on the mixed human atheroma cell culture, cells were cultured immediately after isolation at 10<sup>6</sup> cells per milliliter in Roswell Park Memorial Institute (RPMI) medium containing 5% FBS (Biosera) in the presence or absence of 25  $\mu$ g/mL Poly(I:C), 1  $\mu$ M Cytosine-phosphate-Guanine (CpG) ODN2006, and 1  $\mu$ M CpG ODN2006 control (Invivogen) for 24 and 48 h. The concentrations used were selected on the basis of dose-response experiments as the dose with maximal effect in absence of cell death monitored via 3-(4,5-dimethyl-2-yl)-2,5-diphenyltetrazolium (MTT).

**ELISA Analysis of Human Cytokine Levels.** Cytokine production in supernatants of AthSMC and AoSMC were measured by ELISA using IL-6, IL-8, and CCL2/MCP-1 (PharMingen). IFN $\alpha$  was detected via a high sensitivity ELISA kit from R&D Systems. Each condition was tested in triplicate and each triplicate was analyzed separately. Concomitantly, viability was monitored with the use of MTT (Sigma).

**Gene Expression Profiling and Quantitative PCR in Human SMC.** SMC were plated in 9.6-cm<sup>2</sup> dishes and grown until near confluence. SMC were serum starved for 24 h before stimulation with 25  $\mu$ g/mL Poly(I:C) for 5 h. Total cellular RNA was extracted from SMC using the RNeasy Mini Kit (Qiagen) according to the manufacturer's instructions. To remove any residual genomic DNA, RNA samples were treated with DNase (TurboDNase, Ambion) according to the manufacturer's instructions. RNA was reverse-transcribed to cDNA using M-MLV Reverse Transcriptase (Promega). Quantitative PCR (Q-PCR) analysis of 84 atherosclerosis-related genes was performed using Atherosclerosis RT2 Profiler PCR Arrays (SA Bioscience) as per the manufacturer's protocol. The complete list of the genes analyzed is available at [http://www.sabiosciences.com/rt\\_pcr\\_product/HTML/PAHS-038A.html](http://www.sabiosciences.com/rt_pcr_product/HTML/PAHS-038A.html). RT2 Profiler PCR arrays were run on an ABI 7900HT machine (Applied Biosystems). Duplicate arrays were run per condition for unstimulated and Poly(I:C)-stimulated AoSMC and AthSMC. Data analysis was performed using the manufacturer's integrated web-based software package for the PCR Array System using cycle threshold (Ct)-based fold-change calculations.

Alternatively, AoSMC and AthSMC were stimulated with 25  $\mu$ g/mL Poly(I:C) or IFN $\alpha$  at 10 ng/mL or IFN $\gamma$  at 10 ng/mL. Total RNA was extracted using RNeasy Mini Kit as above, and Toll-like receptor 3 (TLR3) gene expression was quantified via Q-PCR with TaqMan Gene Expression Assays (Hs01551078\_m1\*; Applied Biosystems).

**Detection of TLR3 Expression on SMC via Flow Cytometry.** SMC were grown until near confluence in 50-cm<sup>2</sup> tissue culture dishes and serum-starved for 24 h. Cells were then scraped in cold PBS and washed in FACS buffer (PBS in 1% FBS, 0.09% NaN<sub>3</sub>). Cells

were either left untouched or permeabilized with BD Perm/Wash buffer (BD Biosciences). Cells were subsequently stained with FITC-conjugated anti-TLR3 antibody or isotype control (Abcam) and analyzed by FACSscan (Becton Dickinson) and Flow-Jo Software (TreeStar).

**RT-PCR of Murine Tissues.** Total RNA was isolated from murine tissues using the Qiagen RNeasy kit according to the manufacturer's instructions. Total RNA was treated with DNase I and reverse-transcribed to cDNA using M-MLV Reverse Transcriptase RNase H-, Point Mutant (Promega) and oligo(dT) primer. RT-PCR was performed using the following TaqMan (Applied Biosystems) gene expression assays: CCL5 (Mm01302427\_m1), VCAM1 (Mm01320970\_m1), CCL2 (Mm00441242\_m1), TLR3 (Mm01207403\_m1), IL-10 (Mm01288386\_m1), PD-L1 (Mm00452054\_m1\*), PD-L2 (Mm00451734\_m1\*), and IFN $\beta$  (Mm00439552\_s1\*) and TaqMan universal PCR Master Mix (Applied Biosystems) on a 7900HT Fast Real-Time PCR System (Applied Biosystems). PCR amplification was carried out for 40 cycles. Samples were normalized to  $\beta$ -actin. The  $2^{-\Delta\Delta\text{Ct}}$  method was used to analyze the relative changes in gene expression.

**Morphometric Measurement of Neointima Formation in Perivascular Collar Injury.** Twenty days following collar placement, mice were euthanized, terminal blood was collected via cardiac puncture, and the vasculature perfused with 0.9% saline. Injured carotids were dissected out and frozen at  $-80^{\circ}\text{C}$  in optimal cutting temperature (OCT) compound (ThermoScientific). Sham-operated contralateral arteries were used as controls. Mice were fed regular chow throughout the duration of the experiment.

For the injured carotid artery, serial 5- $\mu$ m cryosections were taken of the carotid tissue distal to the collar. Five sections were collected on each slide, and 15–25 slides were collected per arterial segment. The first five alternate slides were stained with Accustain elastic stain kit (Sigma) according to manufacturer's instructions. Measurement of lesion and vessel areas was performed on one section per stained slide using ProgRes CapturePro image analysis software (version 2.5.2.0; Jenoptik). The area between the internal and external elastic arteries was taken as the medial area, and the intimal area was calculated by subtracting the lumen area from the internal elastic lamina area. The intimal medial ratio (IMR) was then calculated by dividing the intimal area by the medial area. The IMR measurements were then averaged for each mouse.

**Analysis of Elastic Lamina Breaks in Perivascular Collar Injury.** Elastin-stained slides were also used to assess the integrity of the elastic laminae. The portion of the carotid artery distal to the collar (the same as used for neointima assessment) was divided into five segments, and representative sections from each segment were evaluated for the presence of interruptions in the elastic lamina. The width of any observed break was measured by drawing a line between the start and end of a break in the external elastic lamina using ProgRes CapturePro image analysis software (version 2.5.2.0; Jenoptik). The width of any elastic lamina break was calculated as the mean width of break across all sections examined for each mouse. Absolute values for size of elastic lamina break were obtained by calibrating the software using an image of a micrometer slide taken at the same magnification.

**Morphometric Measurement of Aortic Root Atherosclerotic Lesion Development.** Mice were weaned at 4 wk of age and fed a standard chow diet for the duration of the experiment. At either 15 or







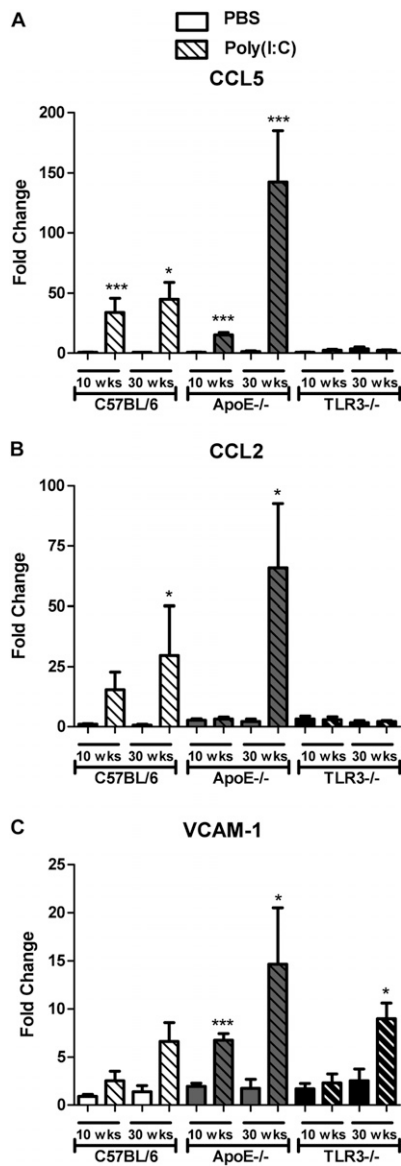

**Fig. 53.** Carotid gene expression of proinflammatory factors is induced by Poly(I:C) stimulation. Ten- and 30-wk-old C57BL/6, ApoE<sup>-/-</sup>, and TLR3<sup>-/-</sup> mice were stimulated with PBS or 250 μg Poly(I:C). Twenty-four hours poststimulation, mice were killed, carotid arteries were harvested, and RNA was extracted. Gene expression of CCL5 (A), CCL2 (B), and VCAM1 (C) in the carotid arteries was examined by quantitative RT-PCR. Bars show overall mean ± SEM [*n* = 4–5 mice per group; \**P* < 0.05, \*\*\**P* < 0.001 PBS vs. Poly(I:C); unpaired Student's *t* test]. CCL2: chemokine (C-C motif) ligand 2; CCL5: chemokine (C-C motif) ligand 5; VCAM1: vascular cell adhesion molecule 1.









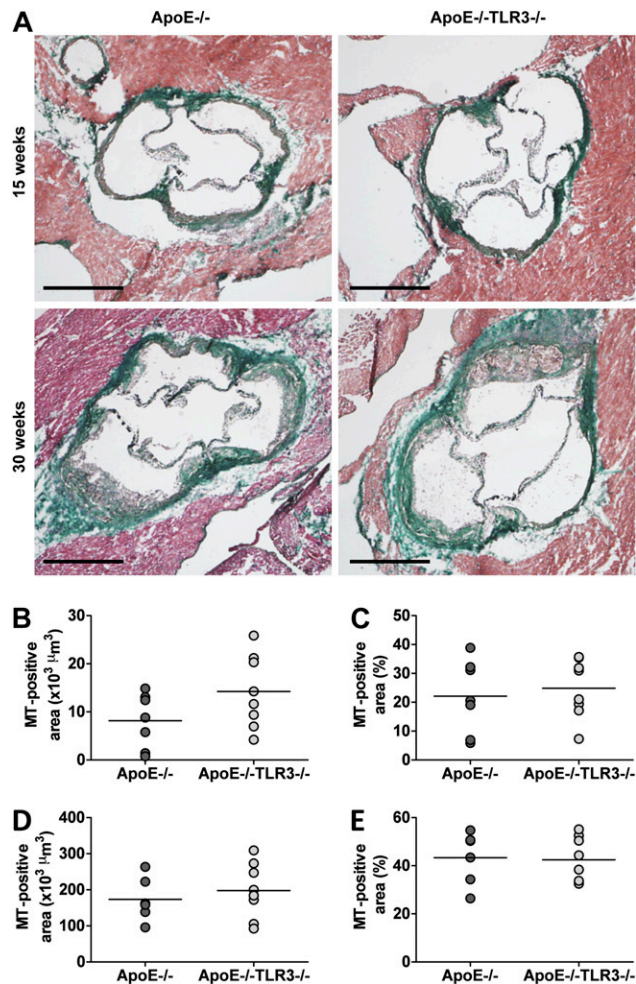

**Fig. S8.** TLR3 deficiency does not affect lesional collagen content. (A) Representative photomicrographs of aortic roots from 15- and 30-wk ApoE<sup>-/-</sup> and ApoE<sup>-/-</sup>TLR3<sup>-/-</sup> mice stained with Masson trichrome staining for collagen (green) and muscle (pink). (Scale bars: 500 μm.) (B and D) Aortic root lesion area staining positive for collagen (x10<sup>3</sup> μm<sup>2</sup>) in 15-wk (B) and 30-wk (D) ApoE<sup>-/-</sup> and ApoE<sup>-/-</sup>TLR3<sup>-/-</sup> mice. (C and E) Aortic root lesion area staining positive for collagen (%) in 15- (C) and 30-wk (E) ApoE<sup>-/-</sup> and ApoE<sup>-/-</sup>TLR3<sup>-/-</sup> mice. (B–E) Each circle represents the mean area staining positive per individual mouse. Line represents the mean area staining positive per group ( $n = 6–8$ ;  $P > 0.05$ ; unpaired Student's  $t$  test).

**Table S1.** Baseline characteristics of ApoE<sup>-/-</sup> and ApoE<sup>-/-</sup>TLR3<sup>-/-</sup> mice aged 15 and 30 wk

| Mouse genotype                          | Age (wk) | $n$ | Final body weight<br>± SD (g) | Total cholesterol<br>± SEM (mg/dL) |
|-----------------------------------------|----------|-----|-------------------------------|------------------------------------|
| ApoE <sup>-/-</sup>                     | 15       | 7   | 30.43 ± 2.79                  | 356.0 ± 20.34                      |
| ApoE <sup>-/-</sup> TLR3 <sup>-/-</sup> | 15       | 8   | 29.61 ± 1.12                  | 334.4 ± 26.98                      |
| ApoE <sup>-/-</sup>                     | 30       | 6   | 34.42 ± 2.25                  | 388.6 ± 40.22                      |
| ApoE <sup>-/-</sup> TLR3 <sup>-/-</sup> | 30       | 8   | 34.21 ± 3.57                  | 356.7 ± 34.22                      |
